# Supplementary material
Source: HighWire-hosted journal article supplement (http://www.cmaj.ca/highwire/filestream/59847/field_highwire_adjunct_files/2/151382-res-3-at.pdf)
Supplement: 151382-res-3-at.pdf [file 151382-res-3-at.pdf]

Appendix 3 (as supplied by the authors): Urban and rural areas defined by metropolitan influenced zones (MIZ) in British Columbia.

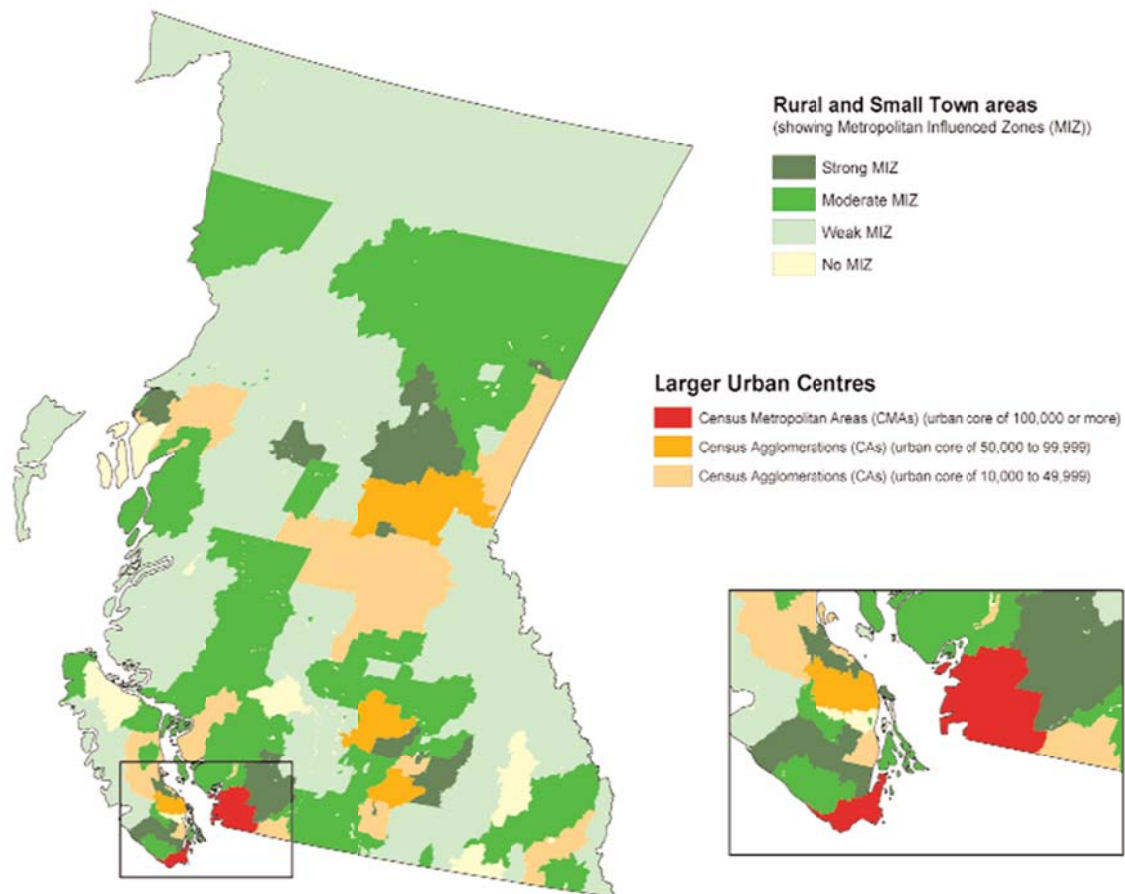

Adapted from Statistics Canada; custom maps developed by Spatial Analysis and Geomatics Applications, Agriculture Division, 2004. Based on the Statistics Canada Census of Population, 2001.<sup>44</sup>  
Note: all tertiary level hospitals are located in Census Metropolitan Areas
